# Supplementary material for: Slow immunological progression in HIV-1 CRF07_BC-infected injecting drug users
Source: PubMed Central journal article supplement — Emerg Microbes Infect. 2013 Dec 11;2(12):e83–. doi: 10.1038/emi.2013.83 (PMC3880871; doi:10.1038/emi.2013.83), 2013-12-11
Supplement: emi201383x3.pdf [file emi201383x3.pdf]

**Figure S3**

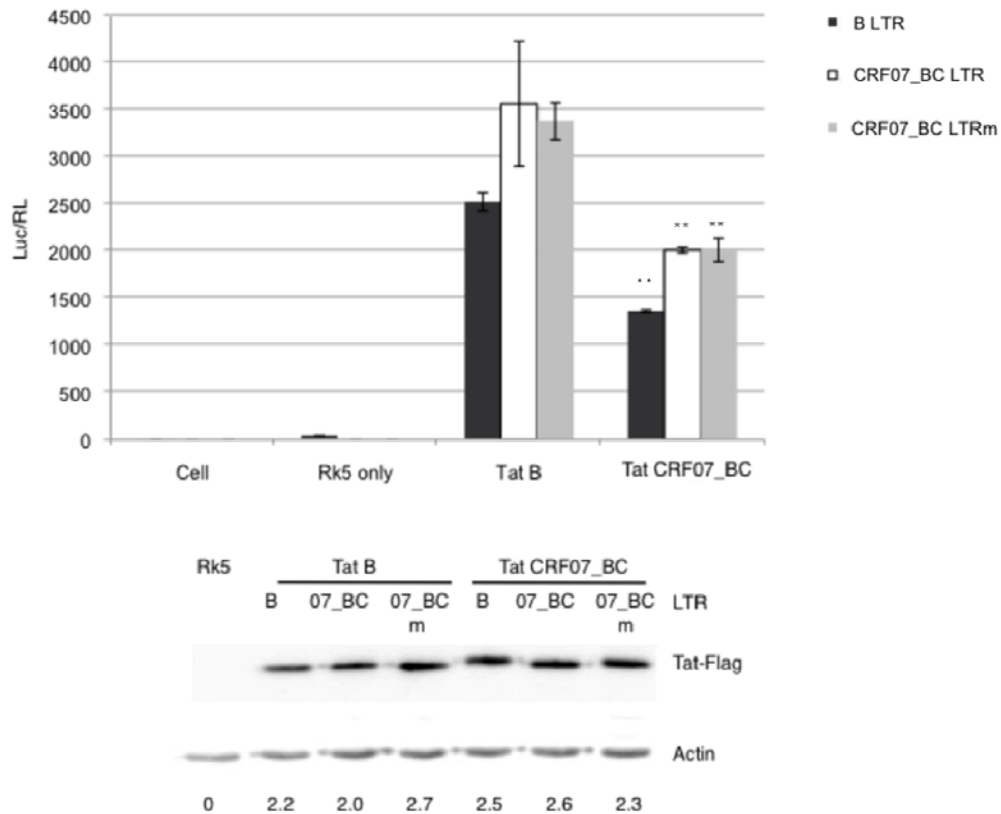

**Supplementary Figure S3 LTR/Tat transactivation activity.** Total cell lysates were harvested at 40 h after co-transfection of pRK5-Tat, pGL2-LTR and pRL-TK plasmids into 293 cells. The luciferase activity was measured using the dual-luciferase reporter assay system. The pRL-TK was used as a transfection control. Values in this figure represent the mean of three independent experiments with its respective standard deviation indicated. Asteric symbols indicated a significant difference between subtype B Tat and CRF07\_BC Tat in the reporter assay system.

## References

1. Wang WK, Lee CN, Dudek T, et al. Interaction between HIV type 1 glycoprotein 120 and CXCR4 coreceptor involves a highly conserved arginine residue in hypervariable region 3. *AIDS Res Hum Retroviruses* 2000; **16**(17): 1821-9.
2. Lin PH, Ke YY, Su CT, et al. Inhibition of HIV-1 Tat-mediated transcription by a coumarin derivative, BPRHIV001, through the Akt pathway. *J Virol* 2011; **85**(17): 9114-26.
3. Sodroski J, Rosen C, Wong-Staal F, et al. Trans-acting transcriptional regulation of human T-cell leukemia virus type III long terminal repeat. *Science* 1985; **227**(4683): 171-3.
4. Tamura K, Peterson D, Peterson N, Stecher G, Nei M, Kumar S. MEGA5: molecular evolutionary genetics analysis using maximum likelihood, evolutionary distance, and maximum parsimony methods. *Mol Biol Evol*; **28**(10): 2731-9.
